# Supplementary material for: Excessive production of mitochondrion-derived reactive oxygen species induced by titanium ions leads to autophagic cell death of osteoblasts via the SIRT3/SOD2 pathway
Source: PubMed Central journal article supplement — Mol Med Rep. 2020 Apr 24;22(1):257–64. doi: 10.3892/mmr.2020.11094 (PMC7248520; doi:10.3892/mmr.2020.11094), 2020-04-24

Figure S1. LV5-SIRT3 vector and transfection. (A) LV5-SIRT3 vector labeled with GFP. (B) Green fluorescent protein image after transfection by fluorescence microscopy. (C) Western blot analysis of SIRT3 protein expression levels after transfection. SIRT3, sirtuin 3; NC, negative control.

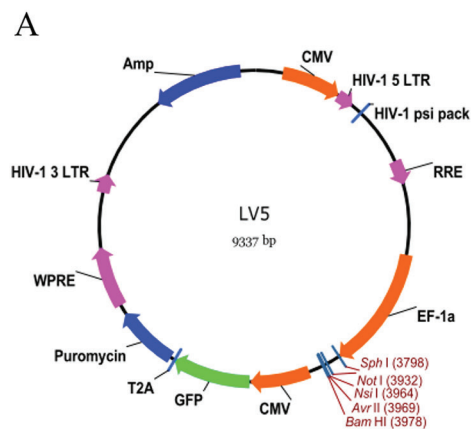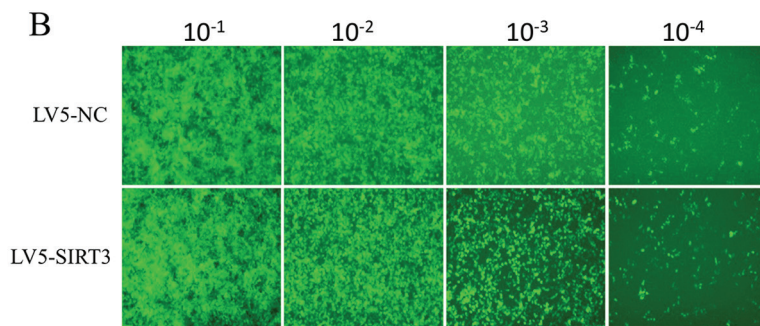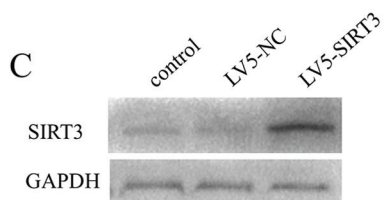

Supplement: Supplementary_Data.pdf [file Supplementary_Data.pdf]
